# Supplementary material for: Super-Dispersed Fe–N Sites Embedded into Porous Graphitic Carbon for ORR: Size, Composition and Activity Control
Source: MDPI journal article supplement (doi:10.3390/nano11082106), 2021-08-19
Supplement: s1 [file s1]

# Supporting Information

## Super-Dispersed Fe–N Sites Embedded into Porous Graphitic Carbon for ORR: Size, Composition, and Activity Control

Xin Yu Wang <sup>1</sup>; Ze Wei Lin <sup>2</sup>; Yan Qing Jiao <sup>1</sup>; Jian Cong Liu <sup>1,\*</sup>; Rui Hong Wang <sup>1,\*</sup>

<sup>1</sup> Key Laboratory of Functional Inorganic Material Chemistry, Ministry of Education, School of Chemistry and Material Science, Heilongjiang University, Harbin 150080, China; wangxinyu11222021@163.com (X.W.); jiaoyanqing@hlju.edu.cn (Y.J.)

<sup>2</sup> School of Chemical Engineering and Chemistry, Harbin Institute of Technology, Harbin 150001, China; lzw305145514@163.com

\* Correspondence: liujiancong@hlju.edu.cn (J.L.); wangruihong@hlju.edu.cn (R.W.); Tel.: +86-0451-86604331

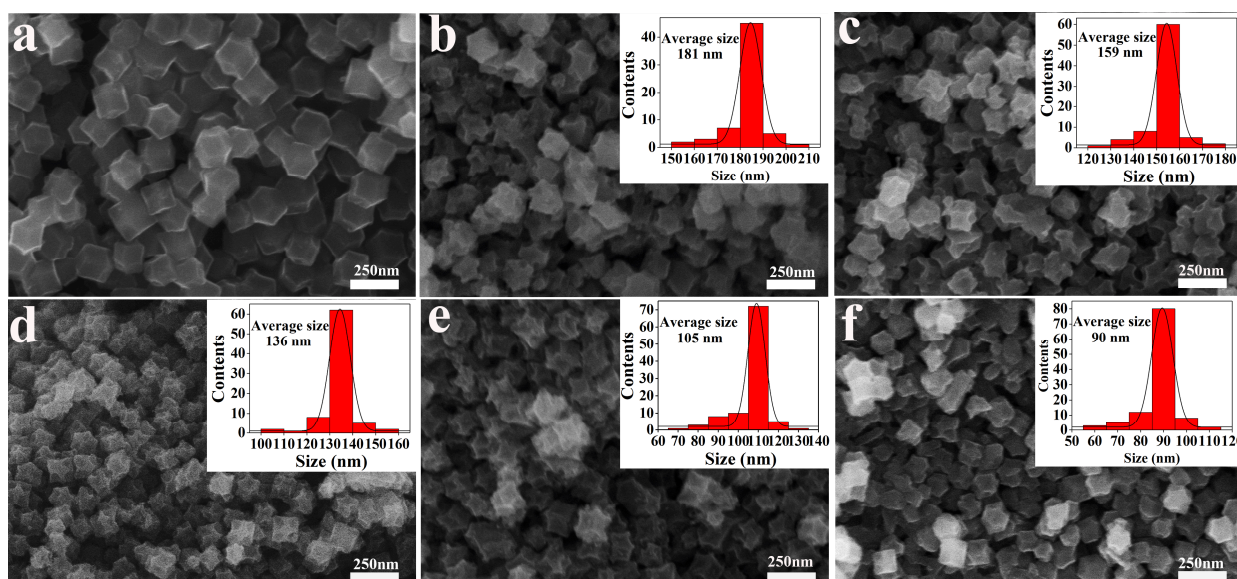

**Figure S1.** (a) SEM image of Fe-ZIF-0.05 precursor and (b–f) SEM images of Fe-N/C-0.05-600, Fe-N/C-0.05-700, Fe-N/C-0.05-800, Fe-N/C-0.05-900 and Fe-N/C-0.05-1000. The illustration shows the particle size distribution.

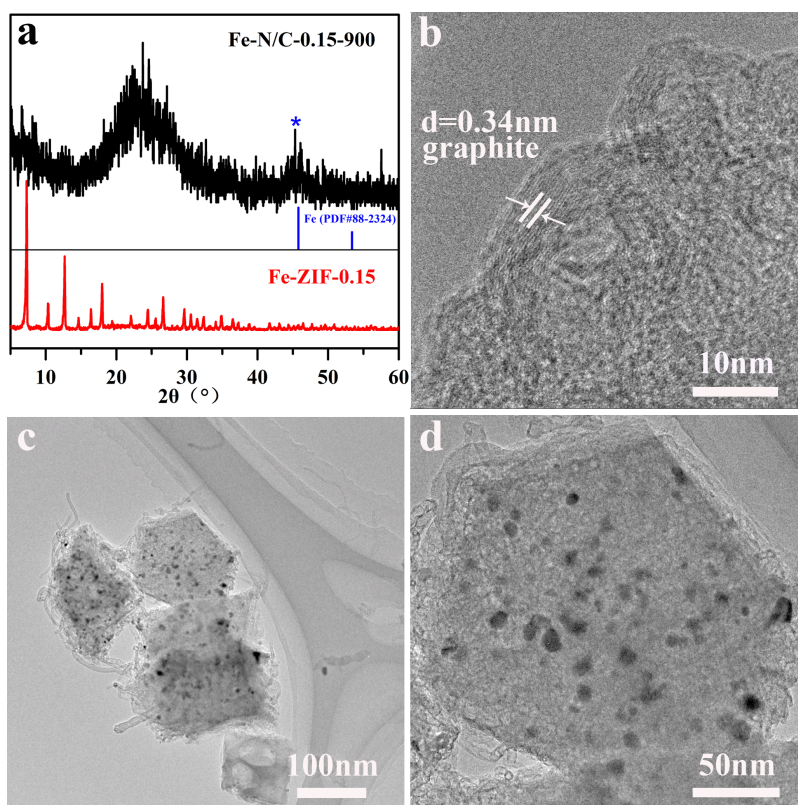

Figure S2. (a) XRD and (b-d) TEM images of Fe-N/C-0.15-900

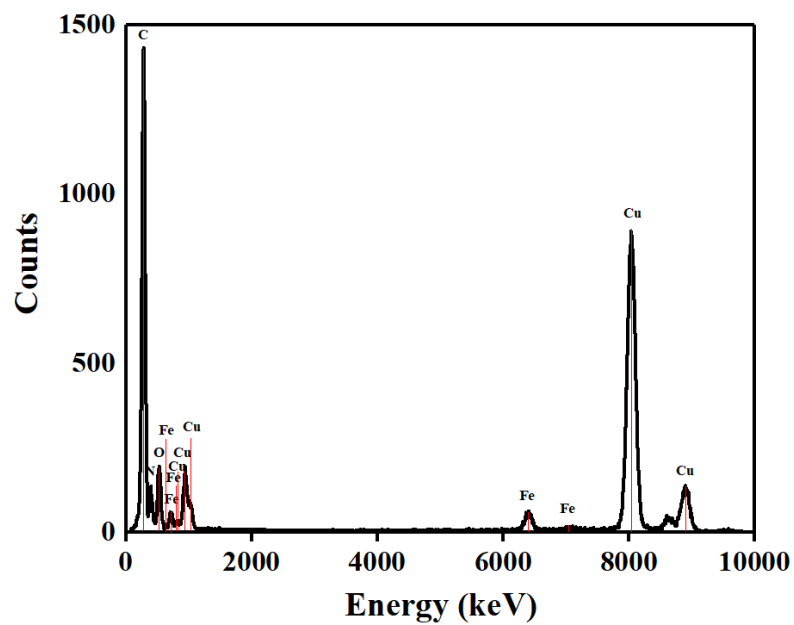

Figure S3. The sum spectrum of the maps for Fe-N/C-0.05-900

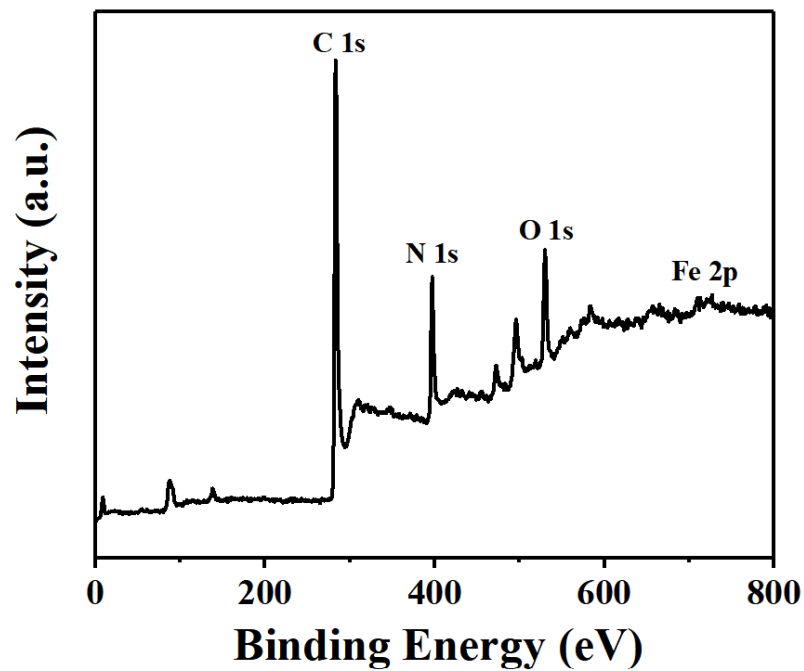

**Figure S4.** The full spectrum of Fe-N/C-0.05-900

**Table S1.** The element atomic contents of Fe, C, N and O in Fe-N/C-0.05-900 by XPS measurement

| Sample          | Element atomic ration (%) |       |      |      |
|-----------------|---------------------------|-------|------|------|
|                 | Fe                        | C     | N    | O    |
| Fe-N-C-0.05-900 | 1.20                      | 87.76 | 7.34 | 3.70 |

**Table S2.** The comparison of ORR activity between our work and the references

| Catalyst                        | $E_{\text{onset}}$ (mV) | $E_{1/2}$ (mV) | $J_{\text{lim}}$ (mA cm <sup>-2</sup> ) | Tafel Slope (mV/dec) | Electrolyte      | Refs.                                                                          |
|---------------------------------|-------------------------|----------------|-----------------------------------------|----------------------|------------------|--------------------------------------------------------------------------------|
| <b>Fe-N/C-0.05-900</b>          | <b>99</b>               | <b>88.5</b>    | <b>4.8</b>                              | <b>52</b>            | <b>0.1 M KOH</b> | <b>In this work</b>                                                            |
| Fe-N/C-155                      | 100                     | 85             | 6.0                                     | --                   | 0.1 M KOH        | <i>J. Mater. Chem. A.</i> <b>2019</b> , 7, 16508-16515. (Ref. 29 in paper)     |
| FeNi0.25-NC                     | --                      | 86             | 5.8                                     | --                   | 0.1M NaOH        | <i>Appl. Surf. Sci.</i> <b>2021</b> , 538, 148017. (Ref. 30 in paper)          |
| C-Fe(OH) <sub>3</sub> @ZIF-1000 | 99                      | 88             | 5.9                                     | --                   | 0.1 M KOH        | <i>ACS Appl. Energy Mater.</i> <b>2019</b> , 2, 3194-3203. (Ref. 31 in paper)  |
| NC@CoFe,NeCNP                   | 97                      | 86.5           | 7.99@85mV                               | 61                   | 1.0 M KOH        | <i>Int. J. Hydrog. Energy.</i> <b>2021</b> , 46, 9341-9350. (Ref. 32 in paper) |
| Fe-N <sub>5</sub> /C@G          | 88                      | 83             | 5.5                                     | --                   | 0.1 M KOH        | <i>New J. Chem.</i> <b>2021</b> , 45, 13004-13014. (Ref. 1 in ESI)             |
| HP S-doped Fe-N-C               | 99                      | 91             | 4.47                                    | 56                   | 1.0 M KOH        | <i>Mater. Today Energy</i> <b>2021</b> , 19, 100624 (Ref. 2 in ESI)            |
| Fe SAs/N-C                      | 101                     | 91             | 5.8                                     | --                   | 0.1 M KOH        | <i>ACS Catal.</i> <b>2019</b> , 9, 2158-2163. (Ref. 3 in ESI)                  |
| FeNPs@PANI/rGO                  | 106.1                   | 94.2           | 4.5                                     | 64                   | 0.1 M KOH        | <i>J. Power Sources.</i> <b>2020</b> , 451, 227733. (Ref. 4 in ESI)            |

|                 |      |      |      |      |           |                                                                              |
|-----------------|------|------|------|------|-----------|------------------------------------------------------------------------------|
| Fe/N/C-48-950-1 | 99   | 86   | 4.8  | --   | 0.1 M KOH | <i>Electrochim. Acta</i> <b>2021</b> , 366, 137408. (Ref. 5 in ESI)          |
| Fe-N/C          | 97.1 | 84.4 | 5.68 | 67   | 0.1 M KOH | <i>Int. J. Hydrog. Energy</i> <b>2019</b> , 44, 27379-27389. (Ref. 6 in ESI) |
| Fe-N/C          | 82   | 72   | 5.0  | 55.6 | 0.1 M KOH | <i>ACS Catal.</i> <b>2017</b> , 7, 1655-1663. (Ref. 7 in ESI)                |

## References

- [1]. Liu, F.; Yan, N.; Zhu, G.Q.; Liu, Z. G.; Ma, S.Q.; Xiang, G.L.; Wang, S.R.; Liu, X. J.; Wang, W. Fe-N-C single-atom catalysts with an axial structure prepared by a new design and synthesis method for ORR. *New J. Chem.* **2021**, 45, 13004-13014.
- [2]. Ma, J. J.; Li, J. S.; Wang, R.G.; Yang, Y. Y.; Yin, P. F.; Mao, J.; Ling, T.; Qiao, S. Z.; Hierarchical porous S-doped Fe-N-C electrocatalyst for high-power-density zinc-air battery. *Mater. Today Energy*. **2021**, 19, 100624.
- [3]. Yang, Z. k.; Wang, Y.; Zhu, M.Z.; Li, Z.J.; Chen, W.X.; Wei, W.C.; Yuan, T.W.; Qu, Y.T.; Xu, Q.; Zhao, C. M. Boosting oxygen reduction catalysis with Fe-N<sub>4</sub> Sites decorated porous carbons toward fuel cells. *ACS Catal.* **2019**, 9, 2158-2163.
- [4]. Mohammad S. A.; Halima B.; Young-Bae K.; Iron nanoparticles implanted metal-organic-frameworks based Fe-N-C catalysts for high-performance oxygen reduction reaction. *J. Power Sources*. **2020**, 451, 227733. 5.
- [5]. Huang, J.W.; Chen, Y. B.; Yang, J. M.; Zhu, H. B.; Yang, H. Boosting the oxygen reduction performance of MOF-5-derived Fe-N-C electrocatalysts via a dual strategy of cation-exchange and guest-encapsulation. *Electrochim. Acta* .**2021**, 366, 137408.
- [6]. Zhang, X. K.; Huang, X.B.; Hu, W. H.; Huang, Y. M. A metal-organic framework-derived Fe-N-C electrocatalyst with highly dispersed Fe-N<sub>x</sub> towards oxygen reduction reaction. *Int. J. Hydrog. Energy* **2019**, 44, 27379-27389.
- [7]. Lai, Q. X.; Zheng, L.R.; Liang, Y.Y.; He, J. P.; Zhao, J. X.; Chen, J. H. Metal-organic-framework-derived Fe-N/C electrocatalyst with five coordinated

Fe-N<sub>x</sub> sites for advanced oxygen reduction in acid media. *ACS Catal.* **2017**, *7*, 1655-1663.

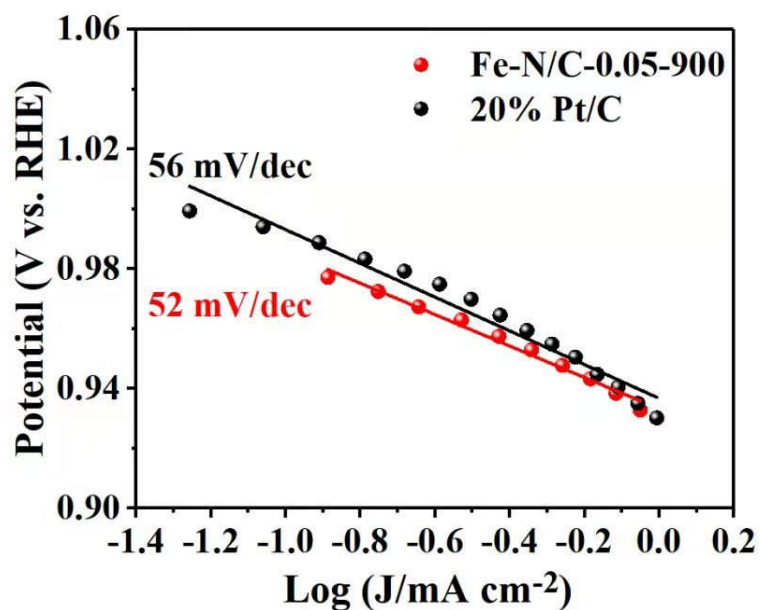

**Figure S5.** Tafel curves of Fe-N/C-0.05-900 and 20% Pt/C catalysts

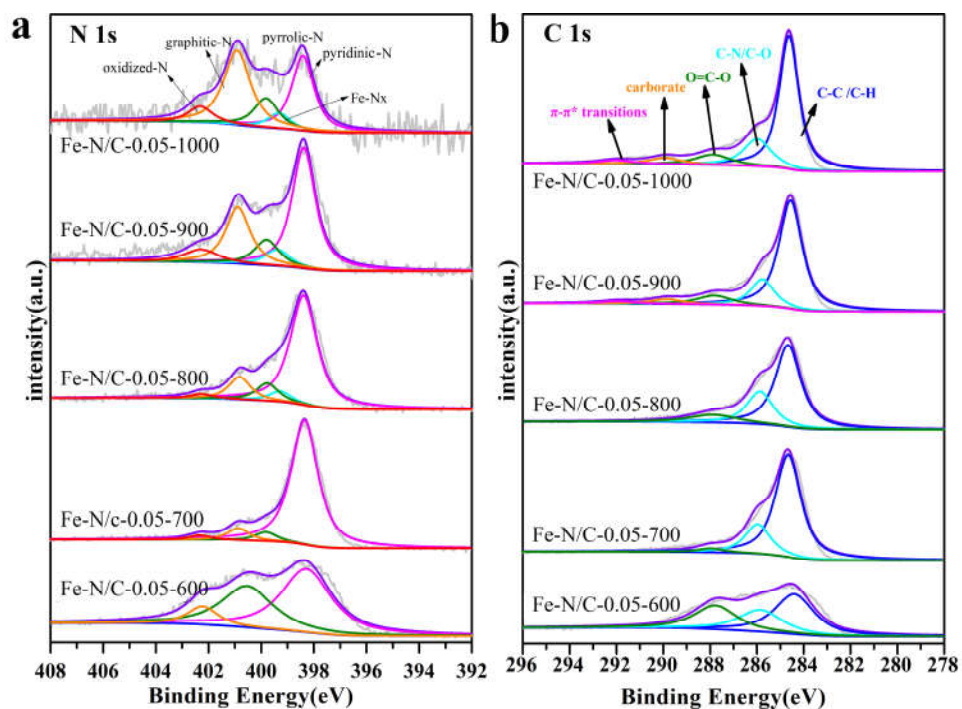

**Figure S6.** The evolution of XPS N 1s (a) and C 1s (b) spectra of the Fe-N/C catalysts with increasing heating temperature up to 1000 °C.

**Table S3.** The N elemental quantification determined by XPS analysis

|       | Fe-N/C-<br>0.05<br>-600 | Fe-N/C-<br>0.05<br>-700 | Fe-N/C-<br>0.05<br>-800 | Fe-N/C-<br>0.05<br>-900 | Fe-N/C-<br>0.05<br>-1000 |
|-------|-------------------------|-------------------------|-------------------------|-------------------------|--------------------------|
| N at% | 16.21                   | 17.71                   | 13.88                   | 7.34                    | 3.69                     |

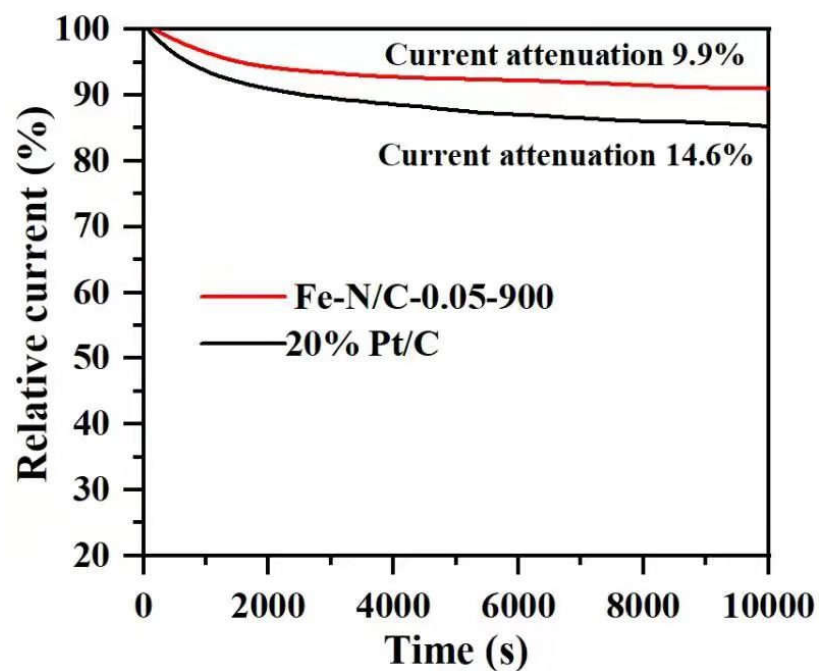

**Figure S7.** Chronoamperometric curves of Fe-N/C-0.05-900 and 20%Pt/C electrodes in O<sub>2</sub>-saturated 0.1 M KOH at a rotating speed of 1600 rpm, the potential was controlled at 0.75 V for 10000 s.
